# Supplementary material for: Highly efficient broadband white-light emission in two-dimensional semi-conductive hybrid lead chlorides
Source: Royal Society of Chemistry journal article supplement (doi:10.1039/d2dt02108k), 2022-01-01
Supplement: d2dt02108k1.pdf [file d2dt02108k1.pdf]

## Supporting Information

### **Highly Efficient Broadband White-light Emission in Two-dimensional Semi-conductive Hybrid Lead–Chlorine Halide**

Yuyin Wang,<sup>a</sup> Chen Sun,<sup>a</sup> Bin Su,<sup>b</sup> Xianfeng Li,<sup>c</sup> Xiangxi Meng,<sup>a</sup>  
Huiru Lou,<sup>a</sup> Ziwen Cheng,<sup>a</sup> Ying Wang<sup>a</sup> and Guoming Lin<sup>\*d</sup>

<sup>a.</sup> *School of Chemistry, Chemical Engineering and Materials, Jining University, Qufu, Shandong, 273155, P. R. China.*

<sup>b.</sup> *School of Materials Science and Engineering in Tsinghua University, Tsinghua University, Beijing, 100000, P. R. China.*

<sup>c.</sup> *Institute of Nanotechnology (INT), Karlsruhe Institute of Technology (KIT), Hermann-von-Helmholtz Platz 1, 76344 Eggenstein-Leopoldshafen, Germany.*

<sup>d.</sup> *Department of physics, National University of Singapore, Singapore 117551. [lingmdb@nus.edu.sg](mailto:lingmdb@nus.edu.sg).*

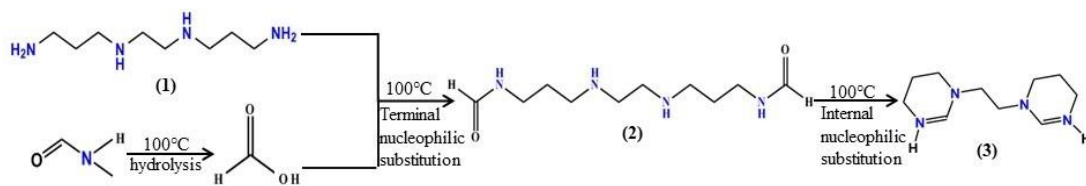

**Scheme S1.** The possible generation route of DTHPE molecule in the preparation process of  $[\text{DTHPE}]\text{Pb}_4\text{Cl}_{10}$ .

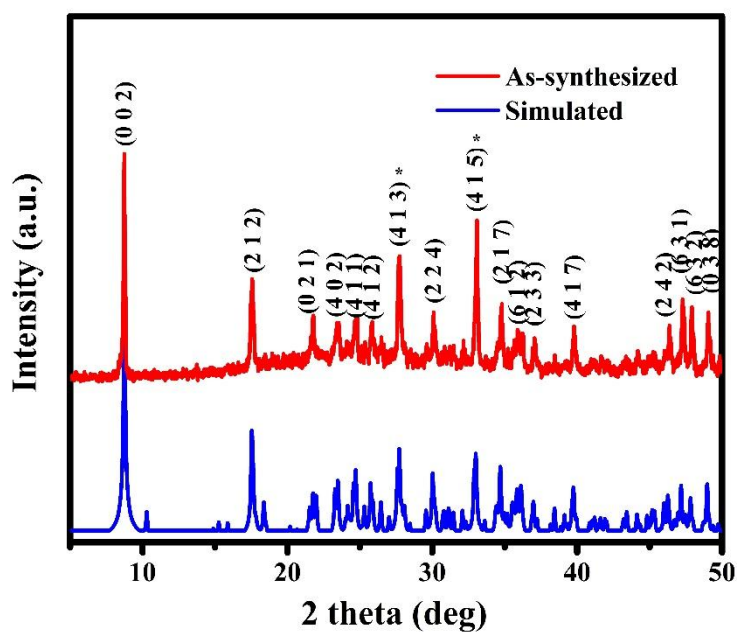

**Fig. S1.** The simulated and experimental XRD patterns of  $[\text{DTHPE}]\text{Pb}_4\text{Cl}_{10}$ . \*stands for the peaks which related with tetranuclear structure of  $[\text{Pb}_3\text{Cl}_{20}]$  clusters.

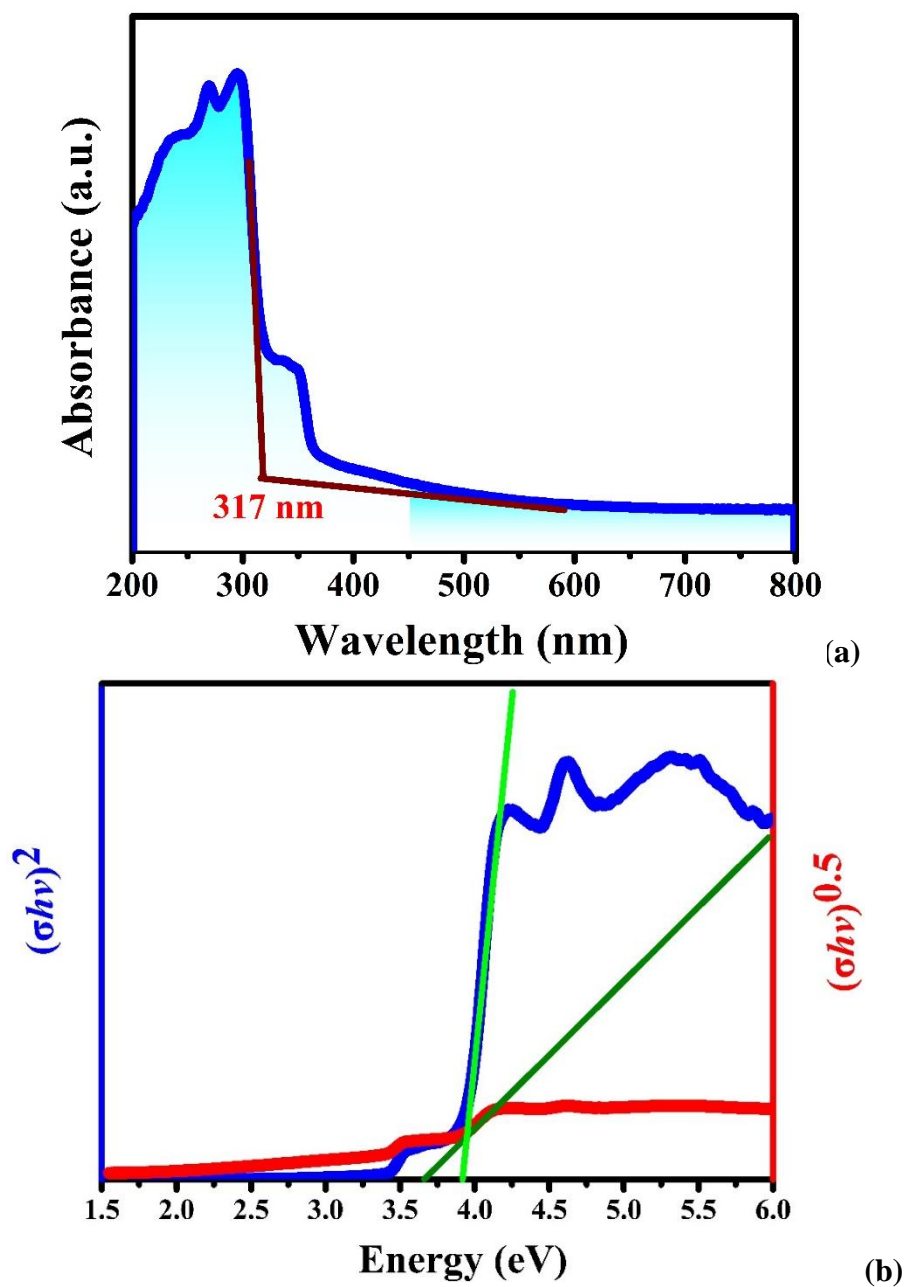

**Fig. S2.** (a) The solid state UV-Vis optical absorption spectrum of [DTHPE]Pb<sub>4</sub>Cl<sub>10</sub>; (b) The Tauc's plots based on the assumptions of direct and indirect transitions.

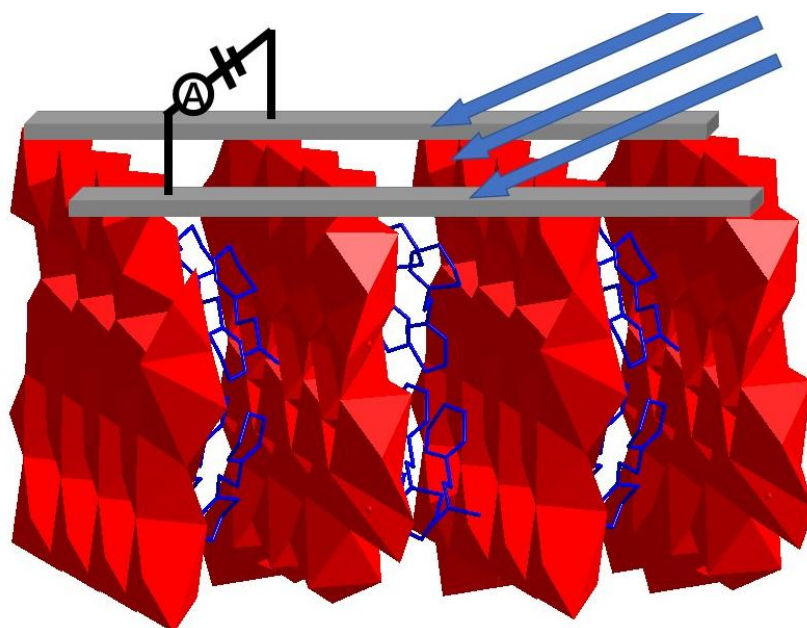

**Fig. S3.** The schematic diagram of the photoconductive device based on the crystal of [DTHPE]Pb<sub>4</sub>Cl<sub>10</sub>.

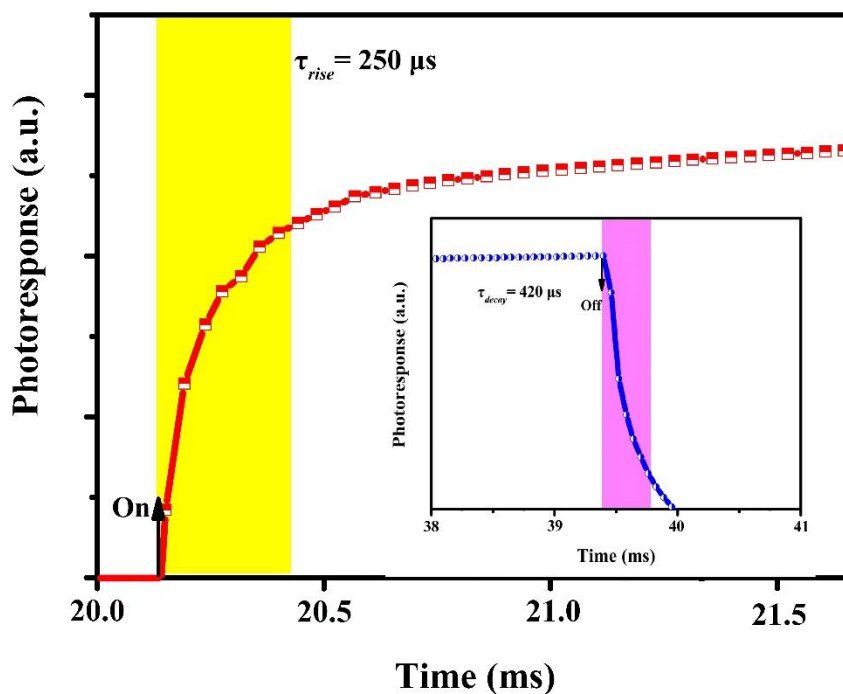

**Fig. S4.** Temporal measurements of photocurrents, affording the  $t_{rise}/t_{fall}$  values of the photoelectric device.

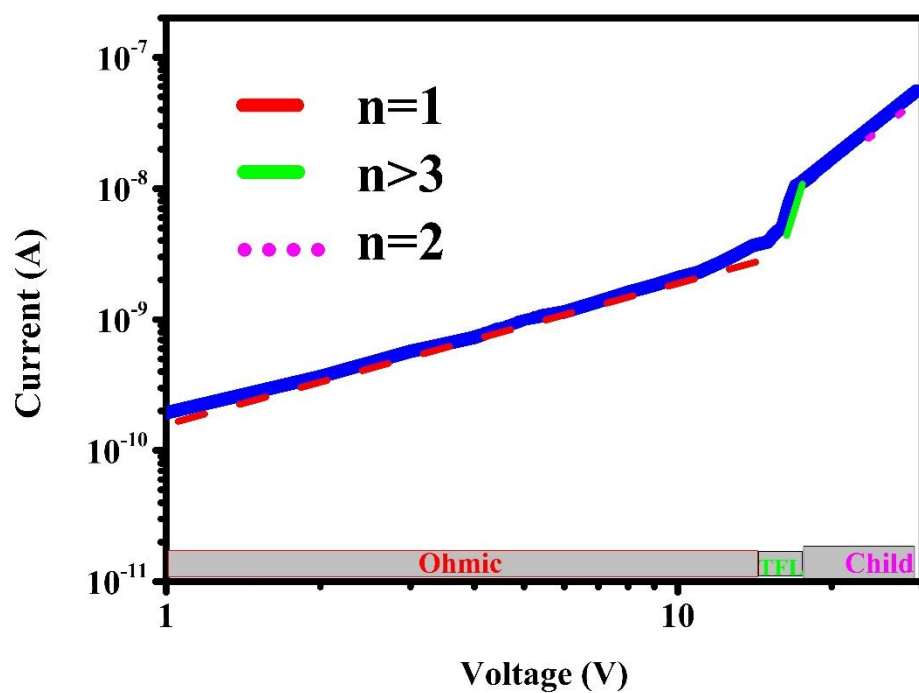

**Fig. S5.** Logarithmic I-V characteristics of [DTHPE]Pb<sub>4</sub>Cl<sub>10</sub> on the basis of the SCLC method.

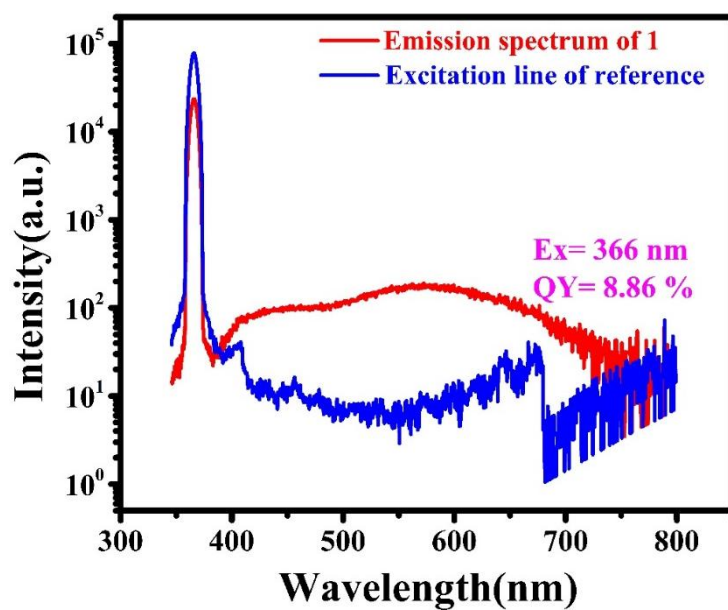

**Fig. S6.** The PLQY of bulk crystals for [DTHPE]Pb<sub>4</sub>Cl<sub>10</sub>.

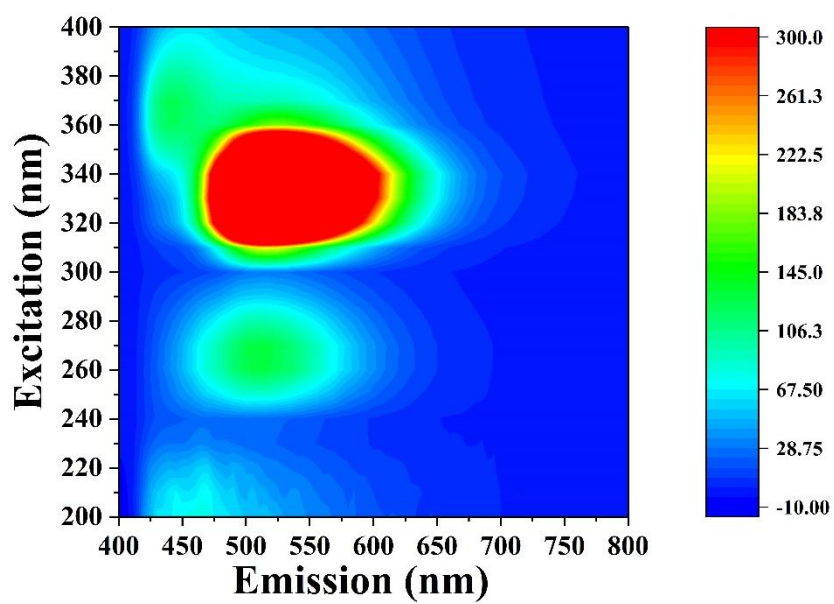

**Fig. S7.** 3D PL excitation and emission correlation map.

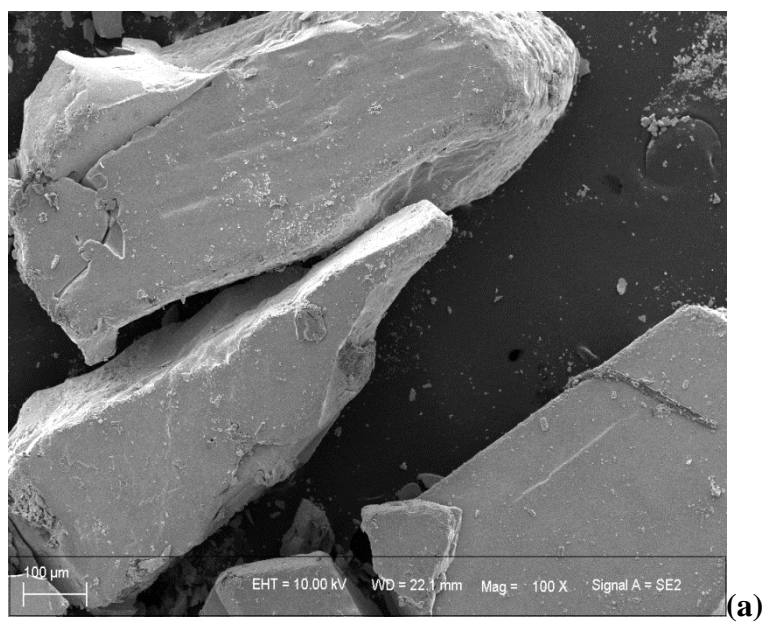

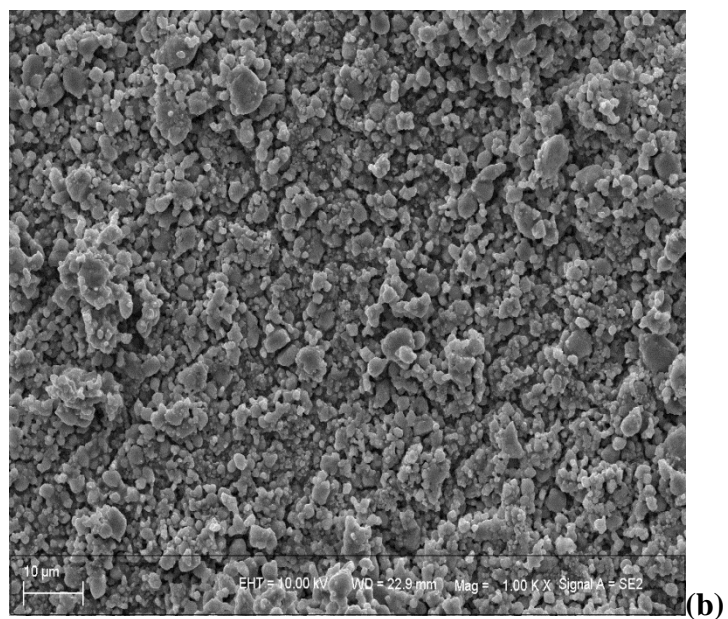

**Fig. S8.** The SEM images of bulk crystals (a) and hand-grinded microscale crystals (b) of [DTHPE]Pb<sub>4</sub>Cl<sub>10</sub>.

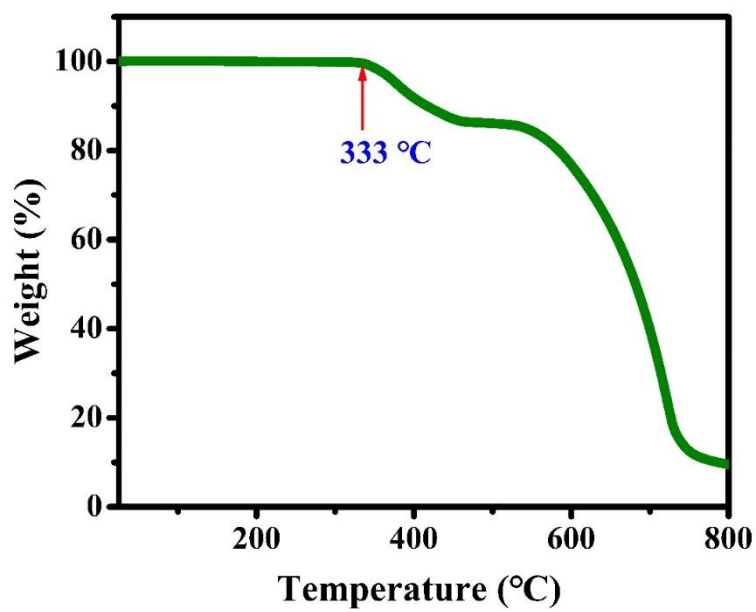

**Fig. S9.** The thermogravimetric (TG) analyses curves for [DTHPE]Pb<sub>4</sub>Cl<sub>10</sub>.

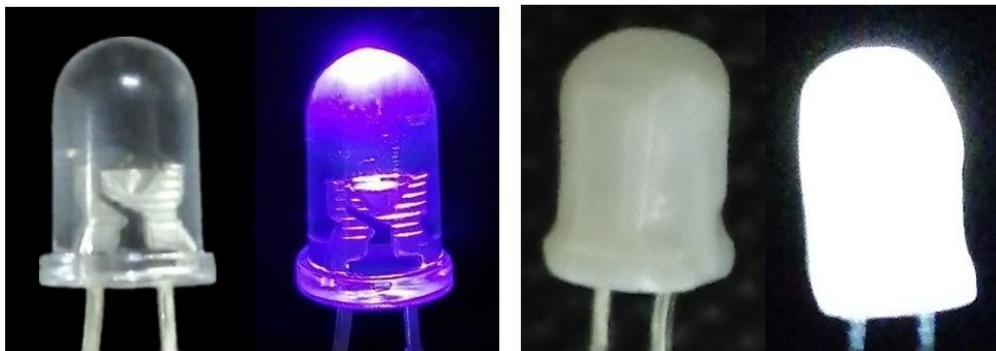

**Fig. S10.** Photographs of UV-LED lamps (left) and the LED coated with a thin layer of [DTHPE]Pb<sub>4</sub>Cl<sub>10</sub> (right), in the states of turn off and on.



**Table S1.** Crystal Data and Structural Refinements for [DTHPE]Pb<sub>4</sub>Cl<sub>10</sub>.

| Compound                                                                                          | [DTHPE]Pb <sub>4</sub> Cl <sub>10</sub>                                       |
|---------------------------------------------------------------------------------------------------|-------------------------------------------------------------------------------|
| chemical formula                                                                                  | C <sub>5</sub> N <sub>2</sub> H <sub>10</sub> Pb <sub>2</sub> Cl <sub>5</sub> |
| fw                                                                                                | 689.80                                                                        |
| Space group                                                                                       | <i>Pbca</i>                                                                   |
| <i>a</i> /Å                                                                                       | 16.358(19)                                                                    |
| <i>b</i> /Å                                                                                       | 8.262(10)                                                                     |
| <i>c</i> /Å                                                                                       | 20.20(2)                                                                      |
| $\beta$ /°                                                                                        | 90                                                                            |
| <i>V</i> (Å <sup>3</sup> )                                                                        | 2730(5)                                                                       |
| <i>Z</i>                                                                                          | 8                                                                             |
| <i>D</i> <sub>calcd</sub> (g·cm <sup>-3</sup> )                                                   | 3.357                                                                         |
| Temp (K)                                                                                          | 296(2)                                                                        |
| $\mu$ (mm <sup>-1</sup> )                                                                         | 25.580                                                                        |
| <i>F</i> (000)                                                                                    | 2423                                                                          |
| Reflections collected                                                                             | 32913                                                                         |
| Unique reflections                                                                                | 3538                                                                          |
| Reflections ( <i>I</i> >2 $\sigma$ ( <i>I</i> ))                                                  | 2496                                                                          |
| GOF on <i>F</i> <sup>2</sup>                                                                      | 1.061                                                                         |
| <i>R</i> <sub>1</sub> , <i>wR</i> <sub>2</sub> ( <i>I</i> > 2 $\sigma$ ( <i>I</i> )) <sup>a</sup> | 0.0368/ 0.0820                                                                |
| <i>R</i> <sub>1</sub> , <i>wR</i> <sub>2</sub> (all data)                                         | 0.0652/ 0.0938                                                                |

<sup>a</sup>  $R_1 = \Sigma ||F_o| - |F_c|| / \Sigma |F_o|$ ,  $wR_2 = [\Sigma (F_o^2 - F_c^2) / \Sigma w(F_o)^2]^{1/2}$

**Table S2.** Selected bond lengths (Å) for [DTHPE]Pb<sub>4</sub>Cl<sub>10</sub>.

|               |          |               |          |
|---------------|----------|---------------|----------|
| Pb(1)-Cl(2)   | 2.752(3) | Pb(2)-Cl(4)#4 | 2.711(3) |
| Pb(1)-Cl(7)   | 2.755(3) | Pb(2)-Cl(3)#4 | 2.803(3) |
| Pb(1)-Cl(1)   | 3.054(4) | Pb(2)-Cl(1)   | 3.042(4) |
| Pb(1)-Cl(1)#1 | 3.065(4) | Pb(2)-Cl(1)#5 | 3.051(4) |
| Pb(1)-Cl(7)#2 | 3.187(4) | Pb(2)-Cl(2)   | 3.114(4) |
| Pb(1)-Cl(3)   | 3.193(3) | Pb(2)-Cl(3)#1 | 3.190(4) |
| Pb(1)-Cl(4)   | 3.254(4) | Pb(2)-Cl(4)#1 | 3.327(4) |
| Pb(1)-Cl(2)#2 | 3.315(4) | Pb(2)-Cl(7)   | 3.348(4) |

Symmetry transformations used to generate equivalent atoms: #1  $-x+1/2, y+1/2, z$ ; #2  $-x+1/2, y-1/2, z$ ; #3  $x+1/2, y, -z+1/2$ ; #4  $x-1/2, y, -z+1/2$ ; #5  $-x, y+1/2, -z+1/2$ .

**Table S3.** Selected bond angles (°) for [DTHPE]Pb<sub>4</sub>Cl<sub>10</sub>.

|                       |            |                       |           |
|-----------------------|------------|-----------------------|-----------|
| Cl(2)-Pb(1)-Cl(7)     | 83.38(10)  | Cl(4)#4-Pb(2)-Cl(3)#4 | 83.36(10) |
| Cl(2)-Pb(1)-Cl(1)     | 77.40(9)   | Cl(4)#4-Pb(2)-Cl(1)   | 79.29(10) |
| Cl(7)-Pb(1)-Cl(1)     | 76.74(10)  | Cl(3)#4-Pb(2)-Cl(1)   | 75.71(10) |
| Cl(2)-Pb(1)-Cl(1)#1   | 75.29(9)   | Cl(4)#4-Pb(2)-Cl(1)#5 | 77.45(9)  |
| Cl(7)-Pb(1)-Cl(1)#1   | 78.91(10)  | Cl(3)#4-Pb(2)-Cl(1)#5 | 77.17(10) |
| Cl(1)-Pb(1)-Cl(1)#1   | 145.11(6)  | Cl(1)-Pb(2)-Cl(1)#5   | 145.93(6) |
| Cl(2)-Pb(1)-Cl(7)#2   | 148.78(7)  | Cl(4)#4-Pb(2)-Cl(2)   | 94.57(10) |
| Cl(7)-Pb(1)-Cl(7)#2   | 98.59(10)  | Cl(3)#4-Pb(2)-Cl(2)   | 147.88(7) |
| Cl(1)-Pb(1)-Cl(7)#2   | 72.85(8)   | Cl(1)-Pb(2)-Cl(2)     | 72.43(8)  |
| Cl(1)#1-Pb(1)-Cl(7)#2 | 135.82(8)  | Cl(1)#5-Pb(2)-Cl(2)   | 133.82(9) |
| Cl(2)-Pb(1)-Cl(3)     | 86.39(10)  | Cl(4)#4-Pb(2)-Cl(3)#1 | 97.40(10) |
| Cl(7)-Pb(1)-Cl(3)     | 150.24(8)  | Cl(3)#4-Pb(2)-Cl(3)#1 | 146.30(6) |
| Cl(1)-Pb(1)-Cl(3)     | 127.90(8)  | Cl(1)-Pb(2)-Cl(3)#1   | 137.74(8) |
| Cl(1)#1-Pb(1)-Cl(3)   | 71.46(8)   | Cl(1)#5-Pb(2)-Cl(3)#1 | 70.22(8)  |
| Cl(7)#2-Pb(1)-Cl(3)   | 104.51(8)  | Cl(2)-Pb(2)-Cl(3)#1   | 65.82(7)  |
| Cl(2)-Pb(1)-Cl(4)     | 142.12(7)  | Cl(4)#4-Pb(2)-Cl(4)#1 | 147.54(6) |
| Cl(7)-Pb(1)-Cl(4)     | 103.25(10) | Cl(3)#4-Pb(2)-Cl(4)#1 | 92.97(9)  |
| Cl(1)-Pb(1)-Cl(4)     | 140.48(8)  | Cl(1)-Pb(2)-Cl(4)#1   | 131.12(9) |
| Cl(1)#1-Pb(1)-Cl(4)   | 69.70(8)   | Cl(1)#5-Pb(2)-Cl(4)#1 | 70.31(8)  |
| Cl(7)#2-Pb(1)-Cl(4)   | 68.06(7)   | Cl(2)-Pb(2)-Cl(4)#1   | 104.82(7) |
| Cl(3)-Pb(1)-Cl(4)     | 69.33(10)  | Cl(3)#1-Pb(2)-Cl(4)#1 | 68.46(10) |
| Cl(2)-Pb(1)-Cl(2)#2   | 91.76(10)  | Cl(4)#4-Pb(2)-Cl(7)   | 147.02(7) |
| Cl(7)-Pb(1)-Cl(2)#2   | 144.48(8)  | Cl(3)#4-Pb(2)-Cl(7)   | 95.78(10) |
| Cl(1)-Pb(1)-Cl(2)#2   | 67.88(8)   | Cl(1)-Pb(2)-Cl(7)     | 68.68(8)  |
| Cl(1)#1-Pb(1)-Cl(2)#2 | 133.81(8)  | Cl(1)#5-Pb(2)-Cl(7)   | 134.69(8) |
| Cl(7)#2-Pb(1)-Cl(2)#2 | 68.55(10)  | Cl(2)-Pb(2)-Cl(7)     | 68.95(10) |
| Cl(3)-Pb(1)-Cl(2)#2   | 63.49(7)   | Cl(3)#1-Pb(2)-Cl(7)   | 100.97(7) |
| Cl(4)-Pb(1)-Cl(2)#2   | 101.99(7)  | Cl(4)#1-Pb(2)-Cl(7)   | 65.38(7)  |

Symmetry transformations used to generate equivalent atoms: #1  $-x+1/2, y+1/2, z$ ; #2  $-x+1/2, y-1/2, z$ ; #4  $x-1/2, y, -z+1/2$ ; #5  $-x, y+1/2, -z+1/2$ .

**Table S4.** Hydrogen bonds data for [DTHPE]Pb<sub>4</sub>Cl<sub>10</sub>.

| D-H ... A         | d(D-H) | d(H ... A) | d(D ... A) | <(DHA) |
|-------------------|--------|------------|------------|--------|
| N(2)-H(2)···Cl(2) | 0.86   | 2.53       | 3.3171     | 152    |
| C(1)-H(1)···Cl(3) | 0.93   | 2.67       | 3.5598     | 160    |

**Table S5.** Comparison of the broadband white light emission properties of [DTHPE]Pb<sub>4</sub>Cl<sub>10</sub> and previously reported hybrid lead chlorine halide.

| Hybrid halides                                                                  | Dimension | PLQE         | Ref.             |
|---------------------------------------------------------------------------------|-----------|--------------|------------------|
| (BZA) <sub>2</sub> PbCl <sub>4</sub>                                            | 2D        | 3.57%        | 1                |
| (H <sub>2</sub> DABCO)(Pb <sub>2</sub> Cl <sub>6</sub> )                        | 3D        | 2.5%         | 2                |
| (EDBE)PbCl <sub>4</sub>                                                         | 2D        | 2%           | 3                |
| (2meptH <sub>2</sub> )PbCl <sub>4</sub>                                         | 2D        | 1.05%        | 4                |
| (C <sub>4</sub> H <sub>9</sub> NH <sub>3</sub> ) <sub>2</sub> PbCl <sub>4</sub> | 2D        | 1%           | 5                |
| (PEA) <sub>2</sub> PbCl <sub>4</sub>                                            | 2D        | ----         | 6                |
| <b>[DTHPE]Pb<sub>4</sub>Cl<sub>10</sub></b>                                     | <b>2D</b> | <b>8.86%</b> | <b>This work</b> |

## Reference

- [1] M. H. Jung, *Inorg. Chem.* 2019, **58**, 6748-6757.
- [2] G. E. Wang, G. Xu, M. S. Wang, L. Z. Cai, W. H. Li and G. C. Guo, *Chem. Sci.* 2015, **6**, 7222-7226.
- [3] E. R. Dohner, A. Jaffe, L. R. Bradshaw and H. I. Karunadasa, *J. Am. Chem. Soc.* 2014, **136**, 13154-13157.
- [4] S. S. Wang, Y. P. Yao, Z. Y. Wu, Y. Peng, L. N. Li and J. H. Luo, *J. Mater. Chem. C.* 2018, **6**, 4053.
- [5] C. M. Ji, S. S. Wang, L. N. Li, Z. H. Sun, M. C. Hong and J. H. Luo, *Adv. Funct. Mater.* 2019, **29**, 1805038.
- [6] S. Yang, Z. H. Lin, J. W. Wang, Y. X. Chen, Z. D. Liu, E. Yang, J. Zhang and Q. D. Ling, *ACS Appl. Mater. Interfaces.* 2018, **10**, 15980-15987.
